# Supplementary material for: The influence of deep oscillation on early physiotherapy results and inflammatory markers in patients after reconstruction of the anterior cruciate ligament of the knee joint
Source: Research Square preprint supplement (doi:10.21203/rs.3.rs-3409914/v1), 2023-10-16
Supplement: Supplementary file 1 [file 256672efe91439f418229b7d.xlsx]

## Sheet: Badania
Lp,	Grupa [1 - eksperymentalna; 2 - kontrolna]	Płeć [1 - kobieta; 2 - mężczyzna]	Wiek [lata]	(VAS) 3D	(VAS) 2T	(VAS) 4T	(BAP-PON I) 3D [N]	(BAP-TBMPPP II) 3D [N]	(BAP-BOSS III) 3D [N]	(BAP-PRZOSS IV) 3D [N]	(BAP-TBMB V) 3D [N]	(BAP-PON I) 2T [N]	(BAP-TBMPPP II) 2T [N]	(BAP-BOSS III) 2T [N]	(BAP-PRZOSS IV) 2T [N]	(BAP-TBMB V) 2T [N]	(BAP-PON I) 4T [N]	(BAP-TBMPPP II) 4T [N]	(BAP-BOSS III) 4T [N]	(BAP-PRZOSS IV) 4T [N]	(BAP-TBMB V) 4T [N]	(OB-KDO-10NSK) 3D [cm]	(OB-KDNO-10NSK) 3D [cm]	(OB-KDO-PSK) 3D [cm]	(OB-KDNO-PSK) 3D [cm]	(OB-KDO-15PSK) 3D [cm]	(OB-KDNO-15PSK) 3D [cm]	(OB-KDO-10NSK) 2T [cm]	(OB-KDNO-10NSK) 2T [cm]	(OB-KDO-PSK) 2T [cm]	(OB-KDNO-PSK) 2T [cm]	(OB-KDO-15PSK) 2T [cm]	(OB-KDNO-15PSK) 2T [cm]	(OB-KDO-10NSK) 4T [cm]	(OB-KDNO-10NSK) 4T [cm]	(OB-KDO-PSK) 4T [cm]	(OB-KDNO-PSK) 4T [cm]	(OB-KDO-15PSK) 4T [cm]	(OB-KDNO-15PSK) 4T [cm]	(FLX-KDO) 3D [⁰]	(FLX-KDNO) 3D [⁰]	(FLX-KDO) 2T [⁰]	(FLX-KDNO) 2T [⁰]	(FLX-KDO) 4T [⁰]	(FLX-KDNO) 4T [⁰]	(EXT-KDO) 3D [⁰]	(EXT-KDNO) 3D [⁰]	(EXT-KDO) 2T [⁰]	(EXT-KDNO) 2T [⁰]
Pacjent 1	1	2	22	10	0	0	12	15	13	15	15	25	20	20	30	15	40	35	35	40	30	47,5	50	40	37,5	39,5	39,5	47,5	50	37	37,5	38	39	49	50	37,5	37,5	38	39	10	130	75	130	95	130	5	0	5	0
Pacjent 2	1	2	32	8	5	0	14	13	15	18	15	35	30	25	35	30	45	40	40	40	45	51	52	44	39,5	43	39	50	52	41,5	39,5	41	39	49	52	38	39,5	38,5	39	30	120	65	120	90	120	10	0	5	0
Pacjent 3	1	2	44	9	0	0	12	15	12	15	10	40	35	30	40	35	40	35	40	40	35	48,5	50	44	39	42	40	49	50	39	39	39	40	49,5	50	39,5	39	39	40	5	130	60	130	90	130	10	0	0	0
Pacjent 4	1	1	25	10	2	0	15	15	13	15	13	25	30	30	35	30	40	45	40	45	45	44,5	44,5	36,5	33	37	35,5	43	44,5	35	33	35,5	35,5	44	44,5	33	33	35,5	35,5	10	125	60	125	75	120	5	0	0	0
Pacjent 5	1	1	34	8	0	0	14	13	15	20	13	25	30	30	40	40	40	50	45	45	50	47	47	38	33	35,5	32,5	45	47	35	33	34,5	32,5	44,5	47	34	33	33,5	32,5	25	130	80	130	90	130	5	0	0	0
Pacjent 6	1	2	37	9	0	0	13	13	12	12	15	30	35	35	40	45	35	45	45	45	50	44,5	46	41	36,5	39	36	45	46	38	36,5	36	36	45,5	46	36,5	36,5	36	36	9	135	70	135	90	135	5	0	0	0
Pacjent 7	1	2	36	10	3	0	13	13	15	15	15	30	30	25	30	35	40	45	35	35	45	49	52	48	39,5	43	40	50	52	41	39,5	40	40	51	52	39	39,5	40	40	10	135	60	135	95	135	7	0	0	0
Pacjent 8	1	2	26	9	2	0	15	15	14	20	14	30	40	20	35	40	45	50	35	40	45	48,5	47,5	43	35,5	40	37	46,5	47,5	38,5	35,5	36	37	45	47,5	36	35,5	35,5	37	20	140	50	140	90	140	5	0	0	0
Pacjent 9	1	1	34	10	0	0	15	10	15	15	15	30	35	40	35	40	40	40	50	45	50	52,5	49	42,5	35,5	38	35,5	48,5	49	37	35,5	35,5	35,5	48,5	49	36	35,5	34,5	35,5	5	125	60	125	90	125	10	0	5	0
Pacjent 10	1	2	40	9	2	0	15	15	14	15	12	30	35	35	30	40	30	40	45	45	45	51	51,5	45	38,5	39,5	37,5	49,5	51,5	38	38,5	39	38	51,5	51,5	39	38,5	38	38	30	125	70	125	95	125	10	0	0	0
Pacjent 11	1	1	31	10	3	0	15	12	12	20	15	20	25	25	35	40	35	40	45	45	55	48	50	41	35	39	37,5	47	50	38	35	37	37,5	49	50	35,5	35	37	37,5	30	115	50	115	65	115	5	0	5	0
Pacjent 12	1	2	24	6	2	0	15	13	13	15	15	45	40	40	25	30	45	45	40	40	45	47,5	47	40	36	37	35	46	47	37	36	36	35	47	47	36	36	35	35	40	135	65	135	100	135	5	0	0	0
Pacjent 13	1	2	39	10	5	0	15	20	15	12	14	25	35	35	35	35	45	55	50	40	45	51	48,5	42	37,5	40	38	49	48,5	39	37,5	38	38	49	48,5	37,5	37,5	38	38	30	140	60	140	95	140	5	0	0	0
Pacjent 14	1	2	24	10	5	0	12	13	15	15	15	30	30	35	35	35	40	40	45	45	45	48	50	42	37	41	39	48	50	39	37	38	39	49	50	38	37	38	39	20	130	60	130	90	130	5	0	5	0
Pacjent 15	1	2	39	10	0	0	13	15	13	20	13	30	30	25	35	35	40	40	45	45	45	50	48	44	38	39	36	49,5	48	42	38	36	36	49,5	48	40	38	36	36	20	135	60	135	90	135	10	0	5	0
Pacjent 16	1	2	40	9	3	0	12	12	15	20	13	30	35	35	35	40	45	45	40	45	55	51	49	44	37,5	40	38	50	49	41	37,5	39	38	48	49	38	37,5	38	38	30	135	65	135	95	135	5	0	0	0
Pacjent 17	1	2	34	10	3	0	15	15	15	20	13	35	40	40	35	45	40	50	45	55	55	51,5	51,5	44,5	36	38,5	37	51,5	51,5	41	36	36	37	51	51,5	37	36	36,5	37	20	120	65	120	95	120	5	0	0	0
Pacjent 18	1	2	36	7	4	0	10	15	13	13	14	35	40	40	35	40	45	45	50	55	50	50	51,5	42,5	39,5	40	39	50	51,5	37,5	39,5	38	39	50	51,5	38	39,5	38,5	39	20	130	65	130	90	130	10	0	0	0
Pacjent 19	1	2	20	8	0	0	15	13	15	15	15	30	35	35	30	45	35	45	45	50	50	47	47,5	43,5	39,5	40	38	46	47,5	41,5	39,5	39	38	47	47,5	40	39,5	38	38	15	140	60	140	80	140	5	0	0	0
Pacjent 20	1	2	29	9	2	0	15	10	10	14	15	35	35	40	35	40	45	45	50	50	55	51,5	51	40	36	43	42	49	51	38	36	41	42	50	51	37	36	39	42	20	130	65	130	110	130	10	0	3	0
Pacjent 21	1	2	43	10	5	2	10	10	15	15	10	30	30	40	35	40	50	55	45	45	55	50	49	43	38	41	39	47	49	39	38	38	39	48	49	38	38	39	39	10	130	75	130	95	130	10	0	5	0
Pacjent 22	1	2	22	7	2	0	10	15	15	15	13	30	35	35	50	35	50	45	45	50	50	47,5	48,5	43	37	35	33	48	48,5	41	37	33	33	48	48,5	38	37	34	33	0	130	50	130	75	130	5	0	0	0
Pacjent 23	1	1	34	10	2	1	10	10	15	13	14	30	35	35	45	40	45	45	45	50	50	50	46,5	44	37	42	38,5	47,5	46,5	39	37	38	38,5	47	46,5	38	37	37	38,5	25	130	70	130	90	130	6	0	0	0
Pacjent 24	1	2	37	10	0	0	20	20	15	15	15	35	35	40	40	35	50	50	45	55	55	49	51	43	38	39,5	37	46	51	41	38	37,5	37	46	5	37	38	37	37	20	125	75	125	110	125	10	0	3	0
Pacjent 25	1	2	22	10	4	1	15	20	20	13	12	30	35	35	30	40	50	45	50	50	55	55	52	42	37,5	40,5	39	53,5	52	39	37,5	38,5	39	51	52	38	37,5	39	39	10	120	60	120	95	120	6	0	2	0
Pacjent 26	1	2	20	10	2	0	13	10	13	20	13	35	35	40	40	45	45	50	45	50	60	60	59	47	42	45	41	53	59	43,5	42	39,5	41	53	59	42,5	42	39	41	0	120	60	120	100	120	10	0	4	0
Pacjent 27	1	2	35	10	2	0	13	14	15	20	13	35	35	35	30	30	45	50	50	45	50	55,5	53	42,5	37	41,5	39	53,5	53	39,5	37	40,5	39	53,5	53	38	37	39,5	39	15	125	70	125	100	125	4	0	0	0
Pacjent 28	1	1	35	10	0	0	13	13	15	15	12	35	30	40	40	45	50	55	50	50	55	50	46	43,5	37,5	42	38,5	47,5	46	39	37	38	38,5	47	46	38	37	37	38,5	0	125	60	125	110	125	5	0	5	0
Pacjent 29	1	2	29	10	0	0	10	12	12	15	15	40	40	35	35	45	45	40	40	40	55	47,5	50	40,5	37,5	39,5	39,5	47,5	50	38	37,5	38	39	49	50	37,5	37,5	38	39	10	130	75	130	100	130	6	0	4	0
Pacjent 30	1	2	35	10	0	0	12	13	13	15	13	35	35	30	30	30	45	45	45	50	50	50	52	44	39,5	43	39	50	52	41,5	39,5	41	39	49	52	38	39,5	38,5	39	30	125	75	125	100	125	8	0	5	0
Pacjent 31	2	2	29	10	8	5	10	10	13	13	12	15	15	15	20	18	20	20	25	25	25	48	50	46	40	41	38	48	50	45	40	40	38	49	50	43	40	39	38	10	120	45	120	60	120	8	0	5	0
Pacjent 32	2	2	27	10	7	5	12	13	15	13	15	15	18	20	18	18	25	25	20	25	30	57	55	45	40	46	44	57	55	44,5	40	45	44	55	55	43,5	40	45	44	0	130	45	130	55	130	10	0	5	0
Pacjent 33	2	1	41	10	8	6	13	15	13	18	18	18	20	20	20	20	25	25	25	25	30	45	44	39	33	36	34	43	44	37	33	35	34	43	44	35	33	34,5	34	15	140	50	140	60	140	8	0	8	0
Pacjent 34	2	2	42	10	7	5	10	15	10	13	13	18	20	20	20	20	30	25	30	30	25	51,5	49	40	35,5	35	33,5	51	49	38	35,5	34,5	33,5	50	50	38	35,5	34	33,5	0	130	40	130	60	130	8	0	5	0
Pacjent 35	2	1	35	10	8	5	13	18	15	15	10	20	25	20	25	18	25	25	30	30	25	49	47	44	40	42	39	48,5	47	43,5	40	41	39	48	47	43,5	40	41	39	10	130	40	130	55	130	6	0	6	0
Pacjent 36	2	2	35	8	8	5	10	12	15	10	13	20	22	25	20	25	25	20	20	20	25	55	53	45	40	40	37	54,5	53	44	40	39,5	37	54	53	43,5	40	39	37	10	130	46	130	55	130	5	0	5	0
Pacjent 37	2	2	30	9	7	5	10	10	15	10	13	20	20	20	15	20	30	25	20	25	25	53,5	52	44,5	39	41,5	38	51	52	43	39	40,5	38	51	52	42	39	40	38	0	135	45	135	55	135	6	0	6	0
Pacjent 38	2	2	24	9	6	4	15	13	18	10	10	15	18	20	15	10	20	20	25	25	25	54	56	44	42	44	40	54	56	44	42	41	40	53	56	43	42	41	40	20	130	40	130	60	130	7	0	7	0
Pacjent 39	2	2	41	10	7	7	10	13	13	20	15	20	15	15	25	20	20	15	25	25	30	58	56	45	40	46	44	57,5	56	44	40	45,5	44	56	56	43	40	45	44	0	140	45	140	55	140	4	0	7	0
Pacjent 40	2	2	36	10	8	5	13	10	13	15	18	20	15	15	20	25	20	15	20	25	25	58	57	47	40	46,5	45	58	57	45	40	46,5	45	53	57	44	40	43,5	45	0	115	30	115	50	115	5	0	7	0
Pacjent 41	2	1	45	9	5	5	10	13	15	20	15	15	13	15	20	20	15	20	20	25	20	52	51	43	36	38,5	34	51	51	41,5	36	36,5	34	50	51	40	36	35	34	0	130	40	130	55	130	15	0	5	0
Pacjent 42	2	1	45	9	7	5	18	13	15	20	10	20	15	15	25	20	20	15	20	25	20	49	50	44,5	35,5	40,5	38	49	50	43,5	35,5	38,5	38	49	50	42,5	35,5	38	38	0	115	38	115	45	115	10	0	5	0
Pacjent 43	2	2	29	10	7	7	20	15	18	15	13	20	15	25	20	15	23	20	25	25	20	52,5	50,5	44,5	38,5	42,5	39	51,5	50,5	43,5	38,5	42	39	49	50,5	42	38,5	41	39	10	135	30	135	40	135	3	0	6	0
Pacjent 44	2	2	30	10	8	4	13	13	15	15	15	20	13	15	20	15	23	20	15	20	15	44	42,5	40	35	37,5	33	42	42,5	38,5	35	36	33	42	42,5	37,5	35	35	33	5	140	35	140	45	140	0	0	5	0
Pacjent 45	2	2	32	10	6	4	10	13	13	15	10	15	13	15	15	13	15	13	15	15	13	44,5	43	39,5	35	37	34	44	43	39	35	37	34	43,5	43	38,5	35	36,5	34	5	135	30	135	45	135	4	0	7	0
Pacjent 46	2	2	35	10	6	4	10	13	15	13	10	15	13	15	15	10	15	15	20	15	15	52,5	50,5	44,5	38,5	42,5	39	51,5	50,5	43,5	38,5	42	39	49	50,5	42	38,5	41	39	10	135	35	135	43	135	0	0	5	0
Pacjent 47	2	2	30	10	5	5	13	15	15	13	10	15	15	15	13	13	15	17	20	15	15	47,5	50	45,5	40	41	38	47	50	45	40	40,5	38	46	50	43	40	39,5	38	0	120	35	120	47	120	10	0	6	0
Pacjent 48	2	1	25	5	5	5	13	13	15	10	10	14	15	15	15	13	15	15	17	20	13	58	57	47	40	46	45	58	57	45	40	46,5	45	54	57	44	40	43,5	45	0	110	35	110	65	110	7	0	5	0
Pacjent 49	2	1	35	8	5	4	10	13	13	20	12	12	13	15	20	14	12	13	20	20	15	54,5	56	44,5	42	44,5	40	54	56	44	42	42	40	53	56	43	42	41	40	7	135	40	135	60	135	4	0	7	0
Pacjent 50	2	1	30	6	6	4	12	15	12	13	14	15	15	15	15	20	20	20	22	20	20	54	56,5	44,5	42	42,5	40	54	56,5	44	42	41,5	40	55	56,5	43,5	42	41	40	15	140	30	140	45	140	0	0	8	0
Pacjent 51	2	2	29	10	7	4	12	13	15	15	10	15	13	20	15	15	15	13	22	15	20	52,5	50,5	44	38,5	42	39	51,5	50,5	43	38,5	42	39	49	50,5	42	38,5	41	39	0	140	35	140	50	140	3	0	5	0
Pacjent 52	2	2	25	10	7	5	16	15	10	15	13	16	15	13	15	15	23	15	20	20	20	43	45	39	33,5	35,5	34,5	43	45	38	33,5	35,5	34,5	43,5	45	36	33,5	35	34,5	5	140	45	140	60	140	3	0	7	0
Pacjent 53	2	1	29	9	6	3	16	12	15	16	13	20	12	15	20	13	23	20	15	23	20	49	49	42,5	37	35	33,5	47	49	42	37	34,5	33,5	47,5	49	41,5	37	34	33,5	25	135	55	135	60	135	9	0	9	0
Pacjent 54	2	2	40	9	6	3	11	13	13	15	13	14	15	15	20	13	19	20	20	25	20	43,5	43,5	40	35	36	34,5	43	43,5	39,5	35	35	34,5	43	43,5	38	35	34,5	34,5	10	135	45	135	60	135	0	0	5	0
Pacjent 55	2	1	41	8	5	3	13	12	15	12	16	15	15	15	15	16	25	20	20	25	20	48.5	50	44	39	42	40	48.5	50	43.5	39	41	40	48	50	43	39	40.5	40	15	135	40	135	55	135	7	0	5	0
Pacjent 56	2	1	35	9	5	5	10	12	15	10	12	14	15	20	12	12	20	25	25	20	20	47.5	50	40	37.5	40	39.5	47	50	39.5	37.5	40	39.5	47	50	39	37.5	39.5	39.5	10	125	45	125	60	125	6	0	5	0
Pacjent 57	2	2	30	10	5	4	13	15	12	10	16	15	15	16	13	15	30	20	20	25	25	50	49	43	38	41	39	47	49	42.5	38	40.5	39	47.5	49	41.5	38	39	39	0	130	35	130	50	130	3	0	6	0
Pacjent 58	2	2	32	10	5	3	14	12	15	10	12	14	15	20	13	15	20	20	20	25	25	52.5	50.5	44.5	38.5	42.5	39	51.5	50.5	43.5	38.5	42	39	49	50.5	42	38.5	41	39	13	135	35	135	50	135	10	0	10	0
Pacjent 59	2	2	32	5	5	2	15	15	10	12	15	15	15	13	15	15	20	25	20	20	15	58	57	47	40	46.5	45	56	57	45	40	46.5	45	54	57	43	40	45.5	45	16	140	30	140	55	140	15	0	10	0
Pacjent 60	2	2	35	10	7	5	12	13	15	15	10	16	15	20	15	10	25	20	25	15	15	48.5	47.5	43	35.5	40	37.5	48	47.5	42	35.5	39	37.5	48	47.5	41	35.5	38.5	37.5	0	135	30	135	60	135	15	0	10	0
[truncated: 17 more columns]

## Sheet: Legenda
Legenda
Grupa [1 - eksperymentalna; 2 - kontrolna]
Płeć [1 - kobieta; 2 - mężczyzna]
Wiek [lata]
Poziom bólu według skali (VAS)
(VAS) 3D - (3 doba po zabiegu)
(VAS) 2T - (2 tygodnie po zabiegu)
(VAS) 4T - (4 tygodnie po zabiegu)
Badanie bólu algezymetrem [N]
Badanie bólu algezymetrem przedział przedni stawu kolanowego (okolica nadrzepkowa) (BAP-PON I) 3D - (3 doba po zabiegu)
Badanie bólu algezymetrem przedział tylny stawu kolanowego (brzusiec mięśnia podkolanowego, brzusiec mięśnia półścięgnistego, półbłoniastego) (BAP-TBMPPP II) 3D - (3 doba po zabiegu)
Badanie bólu algezymetrem przedział boczny stawu kolanowego (okolica szpary stawowej) (BAP-BOSS III) 3D - (3 doba po zabiegu)
Badanie bólu algezymetrem przedział przyśrodkowy stawu kolanowego (okolica szpary stawowej) (BAP-PRZOSS IV) 3D - (3 doba po zabiegu)
Badanie bólu algezymetrem przedział tylny podudzia (brzusiec mięśnia brzuchatego łydki) (BAP-TBMB V) 3D - (3 doba po zabiegu)
Badanie bólu algezymetrem przedział przedni stawu kolanowego (okolica nadrzepkowa) (BAP-PON I) 2T - (2 tygodnie po zabiegu)
Badanie bólu algezymetrem przedział tylny stawu kolanowego (brzusiec mięśnia podkolanowego, brzusiec mięśnia półścięgnistego, półbłoniastego) (BAP-TBMPPP II) 2T - (2 tygodnie po zabiegu)
Badanie bólu algezymetrem przedział boczny stawu kolanowego (okolica szpary stawowej) (BAP-BOSS III) 2T - (2 tygodnie po zabiegu)
Badanie bólu algezymetrem przedział przyśrodkowy stawu kolanowego (okolica szpary stawowej) (BAP-PRZOSS IV) 2T - (2 tygodnie po zabiegu)
Badanie bólu algezymetrem przedział tylny podudzia (brzusiec mięśnia brzuchatego łydki) (BAP-TBMB V) 2T - (2 tygodnie po zabiegu)
Badanie bólu algezymetrem przedział przedni stawu kolanowego (okolica nadrzepkowa) (BAP-PON I) 4T - (4 tygodnie po zabiegu)
Badanie bólu algezymetrem przedział tylny stawu kolanowego (brzusiec mięśnia podkolanowego, brzusiec mięśnia półścięgnistego, półbłoniastego) (BAP-TBMPPP II) 4T - (4 tygodnie po zabiegu)
Badanie bólu algezymetrem przedział boczny stawu kolanowego (okolica szpary stawowej) (BAP-BOSS III) 4T - (4 tygodnie po zabiegu)
Badanie bólu algezymetrem przedział przyśrodkowy stawu kolanowego (okolica szpary stawowej) (BAP-PRZOSS IV) 4T - (4 tygodnie po zabiegu)
Badanie bólu algezymetrem przedział tylny podudzia (brzusiec mięśnia brzuchatego łydki) (BAP-TBMB V) 4T - (4 tygodnie po zabiegu)
Pomiar metryczny obrzęku (kończyna dolna operowana) [cm]
Pomiar metryczny obrzęku (kończyna dolna operowana) (10 cm nad stawem kolanowym) (OB-KDO-10NSK) 3D - (3 doba po zabiegu)
Pomiar metryczny obrzęku (kończyna dolna operowana) (przez staw kolanowy) (OB-KDO-PSK) 3D - (3 doba po zabiegu)
Pomiar metryczny obrzęku (kończyna dolna operowana) (15 cm poniżej stawu kolanowego) (OB-KDO-15PSK) 3D - (3 doba po zabiegu)
Pomiar metryczny obrzęku (kończyna dolna operowana) (10 cm nad stawem kolanowym) (OB-KDO-10NSK) 2T - (2 tygodnie po zabiegu)
Pomiar metryczny obrzęku (kończyna dolna operowana) (przez staw kolanowy) (OB-KDO-PSK) 2T - (2 tygodnie po zabiegu)
Pomiar metryczny obrzęku (kończyna dolna operowana) (15 cm poniżej stawu kolanowego) (OB-KDO-15PSK) 2T - (2 tygodnie po zabiegu)
Pomiar metryczny obrzęku (kończyna dolna operowana) (10 cm nad stawem kolanowym) (OB-KDO-10NSK) 4T - (4 tygodnie po zabiegu)
Pomiar metryczny obrzęku (kończyna dolna operowana) (przez staw kolanowy) (OB-KDO-PSK) 4T - (4 tygodnie po zabiegu)
Pomiar metryczny obrzęku (kończyna dolna operowana) (15 cm poniżej stawu kolanowego) (OB-KDO-15PSK) 4T - (4 tygodnie po zabiegu)
Pomiar metryczny obrzęku (kończyna dolna nieoperowana) [cm]
Pomiar metryczny obrzęku (kończyna dolna nieoperowana) (10 cm nad stawem kolanowym) (OB-KDNO-10NSK) 3D - (3 doba po zabiegu)
Pomiar metryczny obrzęku (kończyna dolna nieoperowana) (przez staw kolanowy) (OB-KDNO-PSK) 3D - (3 doba po zabiegu)
Pomiar metryczny obrzęku (kończyna dolna nieoperowana) (15 cm poniżej stawu kolanowego) (OB-KDNO-15PSK) 3D - (3 doba po zabiegu)
Pomiar metryczny obrzęku (kończyna dolna nieoperowana) (10 cm nad stawem kolanowym) (OB-KDNO-10NSK) 2T - (2 tygodnie po zabiegu)
Pomiar metryczny obrzęku (kończyna dolna nieoperowana) (przez staw kolanowy) (OB-KDNO-PSK) 2T - (2 tygodnie po zabiegu)
Pomiar metryczny obrzęku (kończyna dolna nieoperowana) (15 cm poniżej stawu kolanowego) (OB-KDNO-15PSK) 2T - (2 tygodnie po zabiegu)
Pomiar metryczny obrzęku (kończyna dolna nieoperowana) (10 cm nad stawem kolanowym) (OB-KDNO-10NSK) 4T - (4 tygodnie po zabiegu)
Pomiar metryczny obrzęku (kończyna dolna nieoperowana) (przez staw kolanowy) (OB-KDNO-PSK) 4T - (4 tygodnie po zabiegu)
Pomiar metryczny obrzęku (kończyna dolna nieoperowana) (15 cm poniżej stawu kolanowego) (OB-KDNO-15PSK) 4T - (4 tygodnie po zabiegu)
Pomiar ruchomości zgięcia stawu kolanowego (kończyna dolna operowana) [⁰]
Pomiar ruchomości zgięcia stawu kolanowego (kończyna dolna operowana) (FLX-KDO) 3D - (3 doba po zabiegu)
Pomiar ruchomości zgięcia stawu kolanowego (kończyna dolna operowana) (FLX-KDO) 2T - (2 tygodnie po zabiegu)
Pomiar ruchomości zgięcia stawu kolanowego (kończyna dolna operowana) (FLX-KDO) 4T - (4 tygodnie po zabiegu)
Pomiar ruchomości zgięcia stawu kolanowego (kończyna dolna nieoperowana) [⁰]
Pomiar ruchomości zgięcia stawu kolanowego (kończyna dolna nieoperowana) (FLX-KDNO) 3D - (3 doba po zabiegu)
Pomiar ruchomości zgięcia stawu kolanowego (kończyna dolna nieoperowana) (FLX-KDNO) 2T - (2 tygodnie po zabiegu)
Pomiar ruchomości zgięcia stawu kolanowego (kończyna dolna nieoperowana) (FLX-KDNO) 4T - (4 tygodnie po zabiegu)
Pomiar ruchomości wyprostu stawu kolanowego (kończyna dolna operowana) [⁰]
Pomiar ruchomości wyprostu stawu kolanowego (kończyna dolna operowana) (EXT-KDO) 3D - (3 doba po zabiegu)
Pomiar ruchomości wyprostu stawu kolanowego (kończyna dolna operowana) (EXT-KDO) 2T - (2 tygodnie po zabiegu)
Pomiar ruchomości wyprostu stawu kolanowego (kończyna dolna operowana) (EXT-KDO) 4T - (4 tygodnie po zabiegu)
Pomiar ruchomości wyprostu stawu kolanowego (kończyna dolna nieoperowana) [⁰]
Pomiar ruchomości wyprostu stawu kolanowego (kończyna dolna nieoperowana) (EXT-KDNO) 3D - (3 doba po zabiegu)
Pomiar ruchomości wyprostu stawu kolanowego (kończyna dolna nieoperowana) (EXT-KDNO) 2T - (2 tygodnie po zabiegu)
Pomiar ruchomości wyprostu stawu kolanowego (kończyna dolna nieoperowana) (EXT-KDNO) 4T - (4 tygodnie po zabiegu)
Pomiar krwiaka (kończyna dolna operowana) [cm]
Pomiar krwiaka (długość) (KRW-DŁ) 3D - (3 doba po zabiegu)
Pomiar krwiaka (długość) (KRW-DŁ) 2T - (2 tygodnie po zabiegu)
Pomiar krwiaka (długość) (KRW-DŁ) 4T - (4 tygodnie po zabiegu)
Pomiar krwiaka (szerokość) (KRW-SZ) 3D - (3 doba po zabiegu)
Pomiar krwiaka (szerokość) (KRW-SZ) 2T - (2 tygodnie po zabiegu)
Pomiar krwiaka (szerokość) (KRW-SZ) 4T - (4 tygodnie po zabiegu)
Pomiar badania krwi CRP [ug/ml]
Pomiar CRP (CRP) 3D - (3 doba po zabiegu)
Pomiar CRP (CRP) 2T - (2 tygodnie po zabiegu)
Pomiar CRP (CRP) 4T - (4 tygodnie po zabiegu)
Pomiar badania krwi D-dimer [ng/ml]
Pomiar D-dimer (DD) 3D - (3 doba po zabiegu)
Pomiar D-dimer (DD) 2T - (2 tygodnie po zabiegu)
Pomiar D-dimer (DD) 4T - (4 tygodnie po zabiegu)
Pomiar wolumetryczny obrzęku [cm]
Pomiar wolumetryczny obrzęku (WP) 3D - (3 doba po zabiegu)
Pomiar wolumetryczny obrzęku (WP) 2T - (2 tygodnie po zabiegu)
Pomiar wolumetryczny obrzęku (WP) 4T - (4 tygodnie po zabiegu)
